# Supplementary material for: Electride support boosts nitrogen dissociation over ruthenium catalyst and shifts the bottleneck in ammonia synthesis
Source: PubMed Central journal article supplement (PMC4389256; doi:10.1038/ncomms7731), 2015-03-30
Supplement: ncomms7731-s1.pdf [file ncomms7731-s1.pdf]

## SUPPLEMENTARY INFORMATION

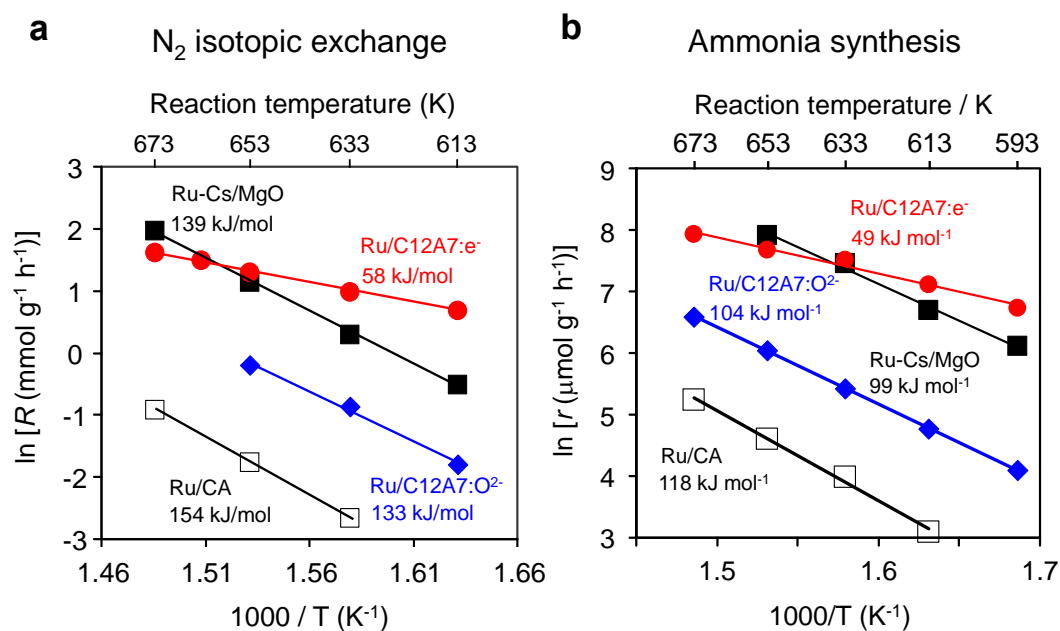

**Supplementary Figure 1 (a)** Temperature dependence of the rate of N<sub>2</sub> isotopic exchange reaction over various Ru catalysts at 26.7 kPa (<sup>15</sup>N<sub>2</sub> : <sup>14</sup>N<sub>2</sub> = 1 : 4). **(b)** Temperature dependence of the rate of ammonia synthesis over various 1 wt% Ru-loaded catalysts at an atmospheric pressure (catalyst = 0.2 g, H<sub>2</sub>:N<sub>2</sub> = 3:1, flow rate = 60 mL min<sup>-1</sup>).

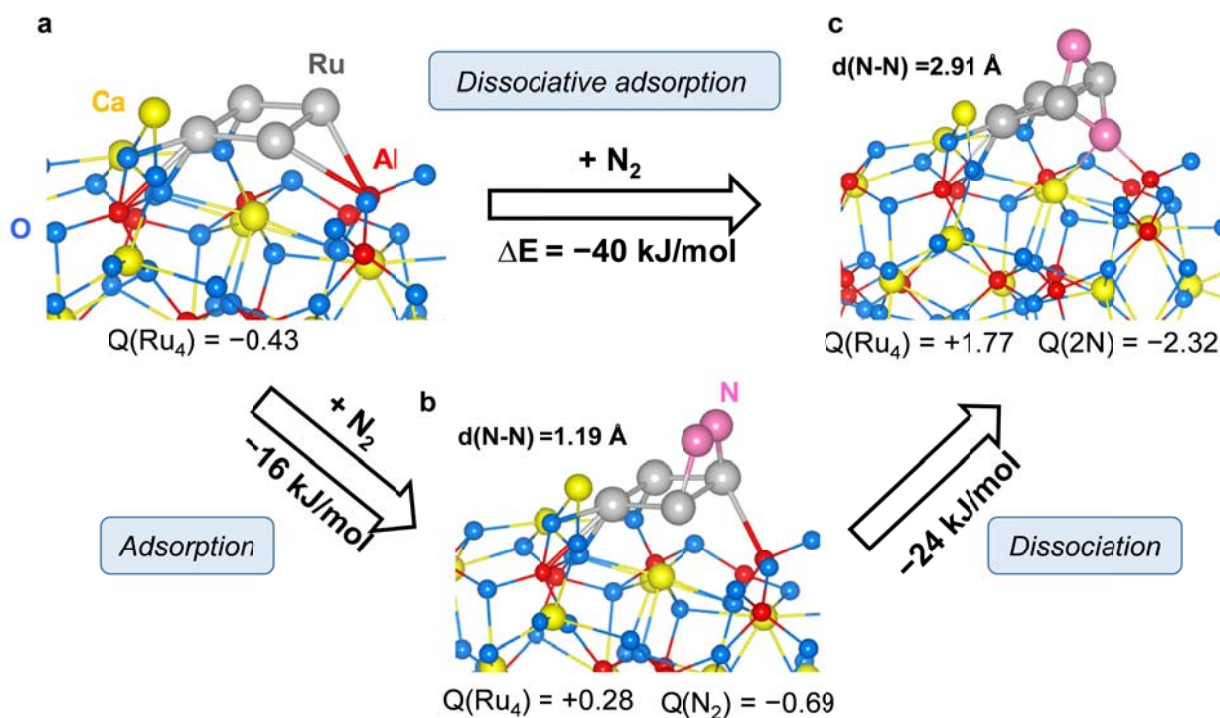

**Supplementary Figure 2** The most stable geometrical configurations of  $\text{Ru}_4$  cluster and  $\text{Ru}_4\text{N}_2$  complex on  $\text{C}_{12}\text{A}_7:\text{O}^{2-}$  surfaces obtained using *ab initio* simulations. (A) The negative charge of the  $\text{Ru}_4$  cluster supported on  $\text{C}_{12}\text{A}_7:\text{O}^{2-}$  is associated with the formation of Ru-O bonds. (B)  $\text{N}_2$  molecule is adsorbed on Ru sites with the adsorption energy of  $16 \text{ kJ mol}^{-1}$ , and the resulting N-N bond length,  $d(\text{N-N})$ , is  $1.19 \text{ \AA}$ . (C)  $\text{N}_2$  dissociation proceeds with the energy gain of  $24 \text{ kJ mol}^{-1}$ , and the resulting N-N distance is  $2.91 \text{ \AA}$ .  $\Delta E$  corresponds to dissociative adsorption, i.e., the sum of the energy of the  $\text{N}_2$  adsorption on  $\text{C}_{12}\text{A}_7$ -supported Ru and the energy gain due to  $\text{N}_2$  dissociation.  $Q(\text{R}_4)$ ,  $Q(\text{N}_2)$ , and  $Q(2\text{N})$  represent Bader charge on  $\text{Ru}_4$  cluster,  $\text{N}_2$  molecule, and resulting two N atoms, respectively.

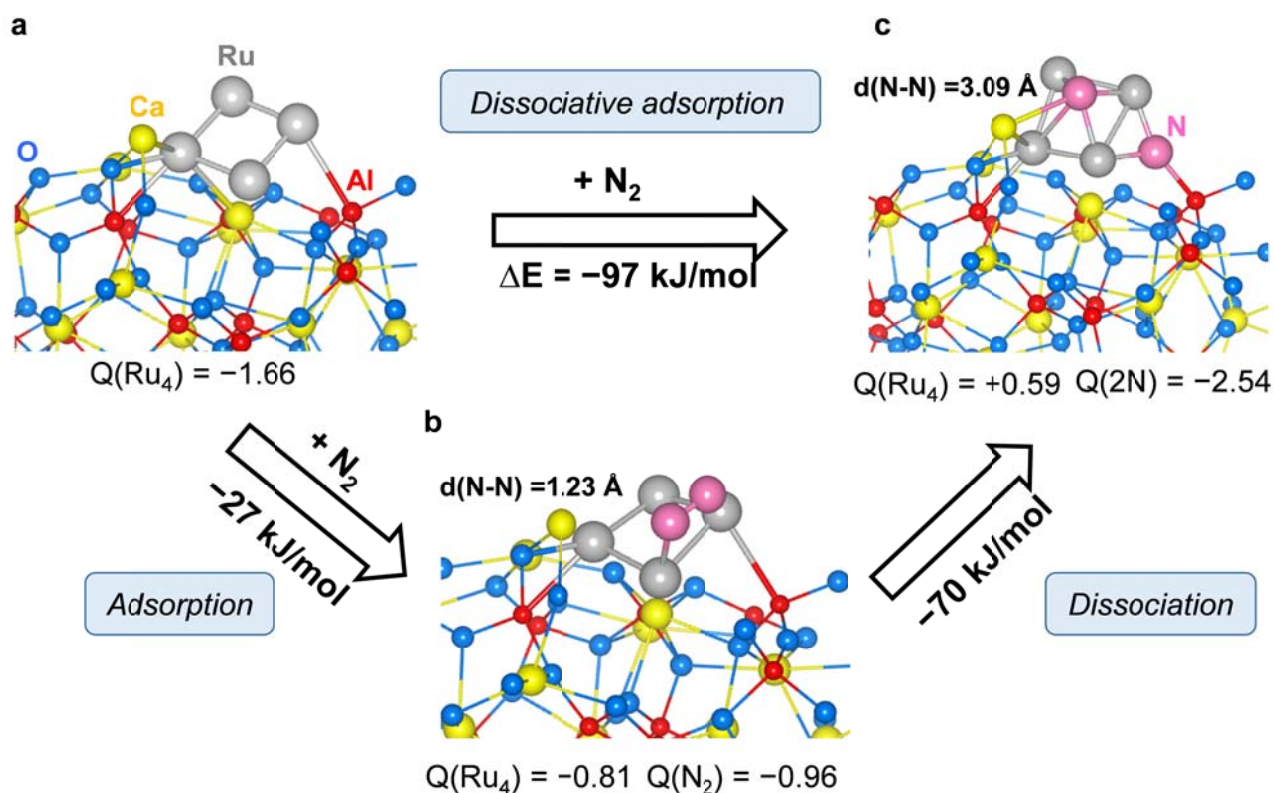

**Supplementary Figure 3** The most stable geometrical configurations of  $\text{Ru}_4$  cluster and  $\text{Ru}_4\text{N}_2$  complex on  $\text{C12A7:e}^-$  surfaces obtained using *ab initio* simulations. (A) The negative charge of the  $\text{Ru}_4$  cluster supported on  $\text{C12A7:e}^-$  is due to both the charge transfer from the substrate to  $\text{Ru}_4$  and the charge density distribution associated with the formation of  $\text{Ru-O}$  bonds. (B)  $\text{N}_2$  molecule is adsorbed on Ru sites with adsorption energy of  $27 \text{ kJ mol}^{-1}$ , and the resulting N-N bond length,  $d(\text{N-N})$ , is  $1.23 \text{ \AA}$ . (C)  $\text{N}_2$  dissociation proceeds with the energy gain of  $70 \text{ kJ mol}^{-1}$ , and the resulting N-N distance is  $3.09 \text{ \AA}$ .  $\Delta E$  corresponds to dissociative adsorption, i.e., the sum of the energy of the  $\text{N}_2$  adsorption on  $\text{C12A7}$ -supported Ru and the energy gain due to  $\text{N}_2$  dissociation.

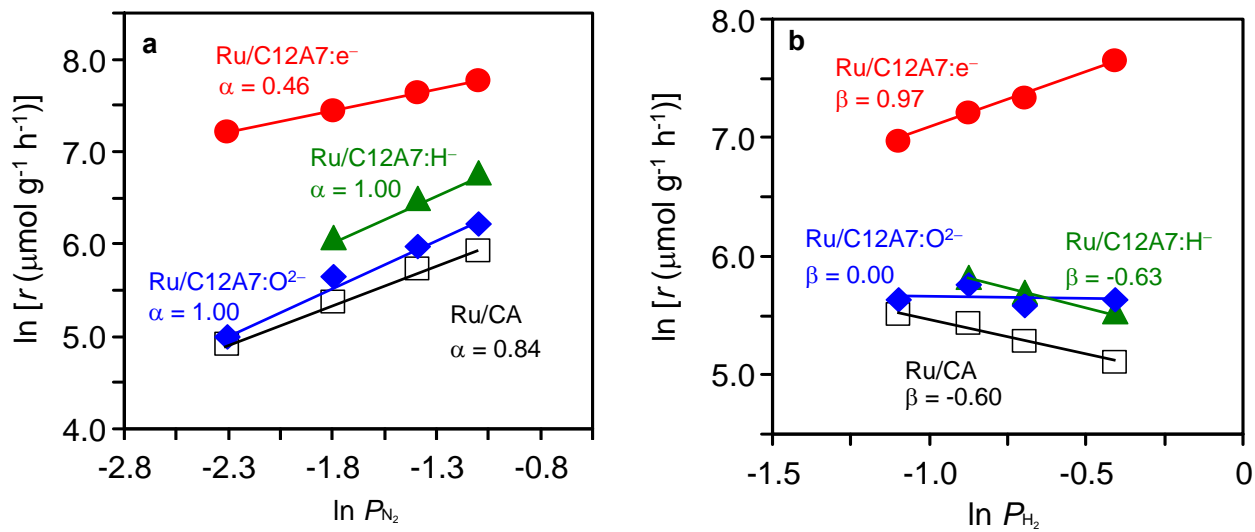

**Supplementary Figure 4** Dependence of NH<sub>3</sub> synthesis rate on the partial pressures of (a) N<sub>2</sub> and (b) H<sub>2</sub> under atmospheric pressure.  $\alpha$  and  $\beta$  represent the reaction orders for N<sub>2</sub> and H<sub>2</sub> in Eq. 2, respectively.

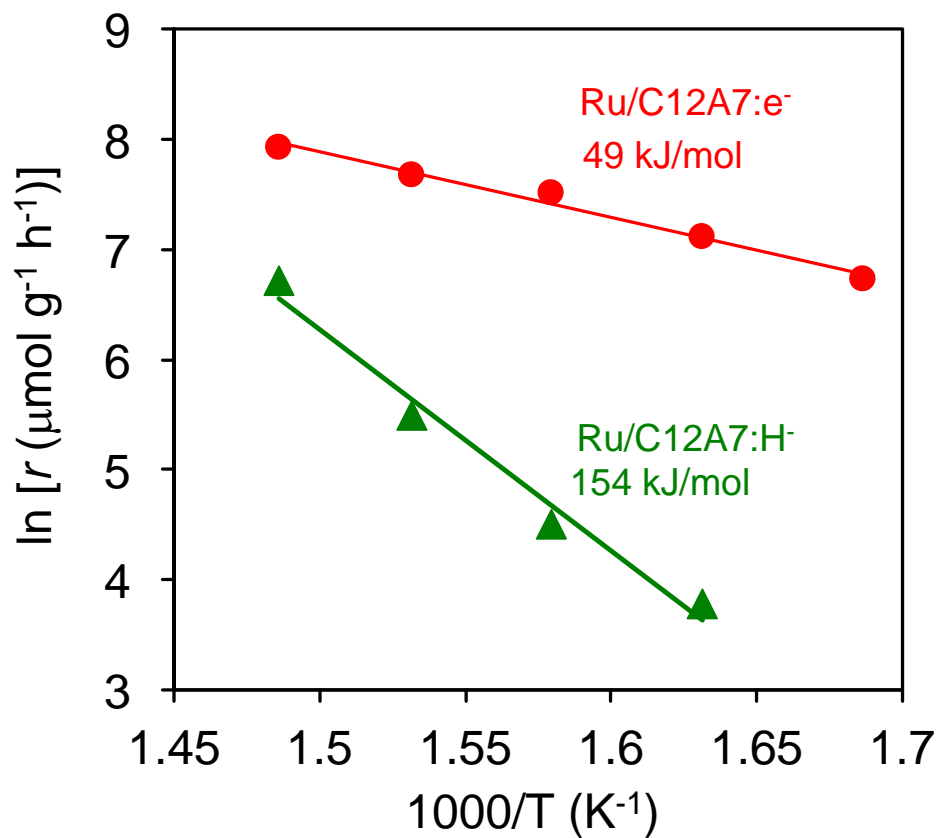

**Supplementary Figure 5** Temperature dependence of the rate of ammonia synthesis over various 1 wt% Ru-loaded catalysts at an atmospheric pressure (catalyst = 0.2 g,  $\text{H}_2:\text{N}_2 = 3:1$ , flow rate = 60  $\text{mL min}^{-1}$ ).

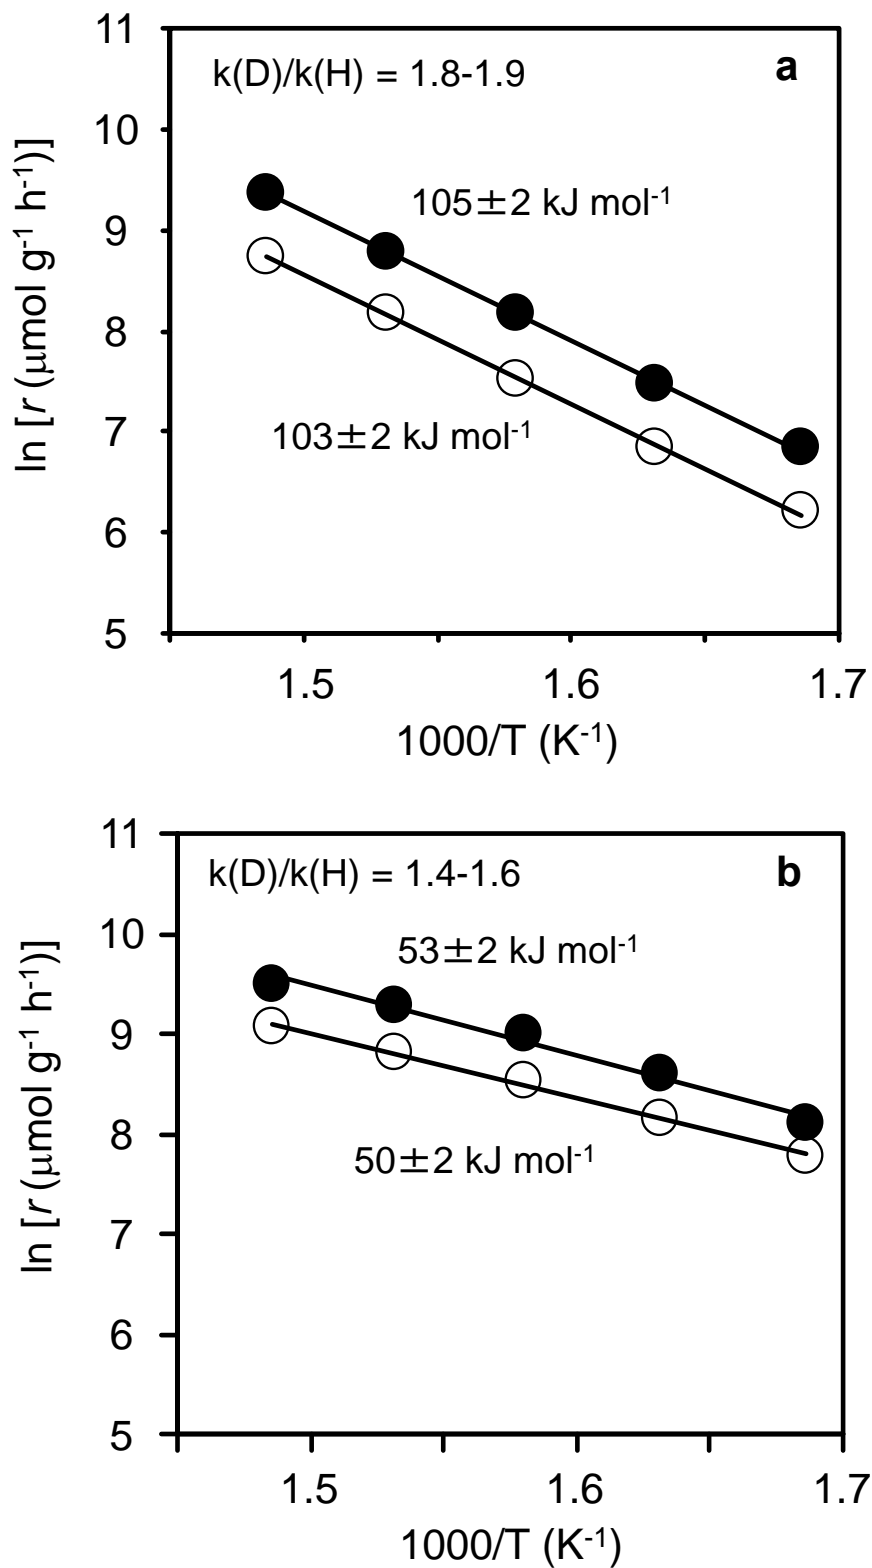

**Supplementary Figure 6** Comparison of rates of ammonia synthesis with H<sub>2</sub> (open circles) and D<sub>2</sub> (filled circles) over (a) 1wt% Ru-Cs/MgO and (b) 1wt% Ru/C12A7:e<sup>-</sup>. (catalyst = 0.025 g, H<sub>2</sub>(or D<sub>2</sub>):N<sub>2</sub> = 3:1, flow rate = 60 mL min<sup>-1</sup>).

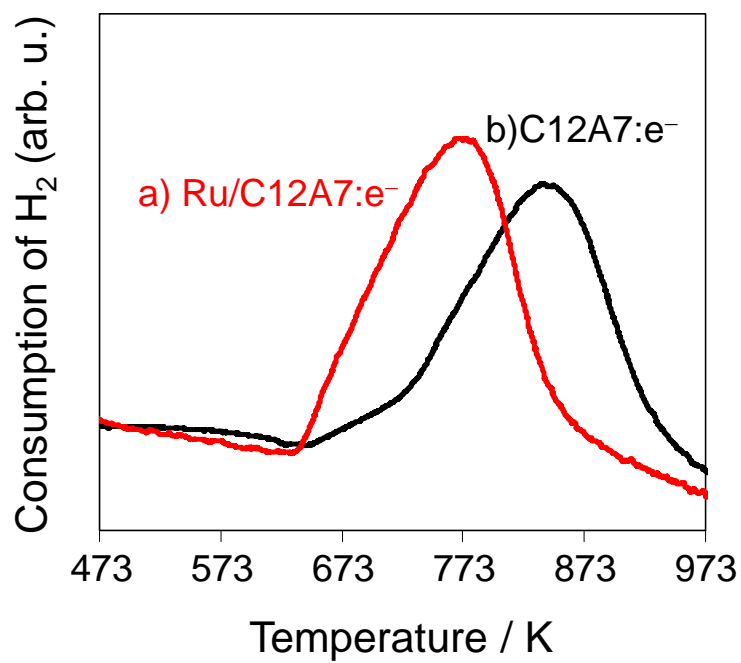

**Supplementary Figure 7** H<sub>2</sub> TPA profiles of a) Ru/C12A7:e<sup>-</sup> and b) C12A7:e<sup>-</sup>. The TPA experiment was performed with a dilute mixture of H<sub>2</sub> (5%) in Ar using a total flow of 10 ml min<sup>-1</sup> and a heating rate of 2 K min<sup>-1</sup>.

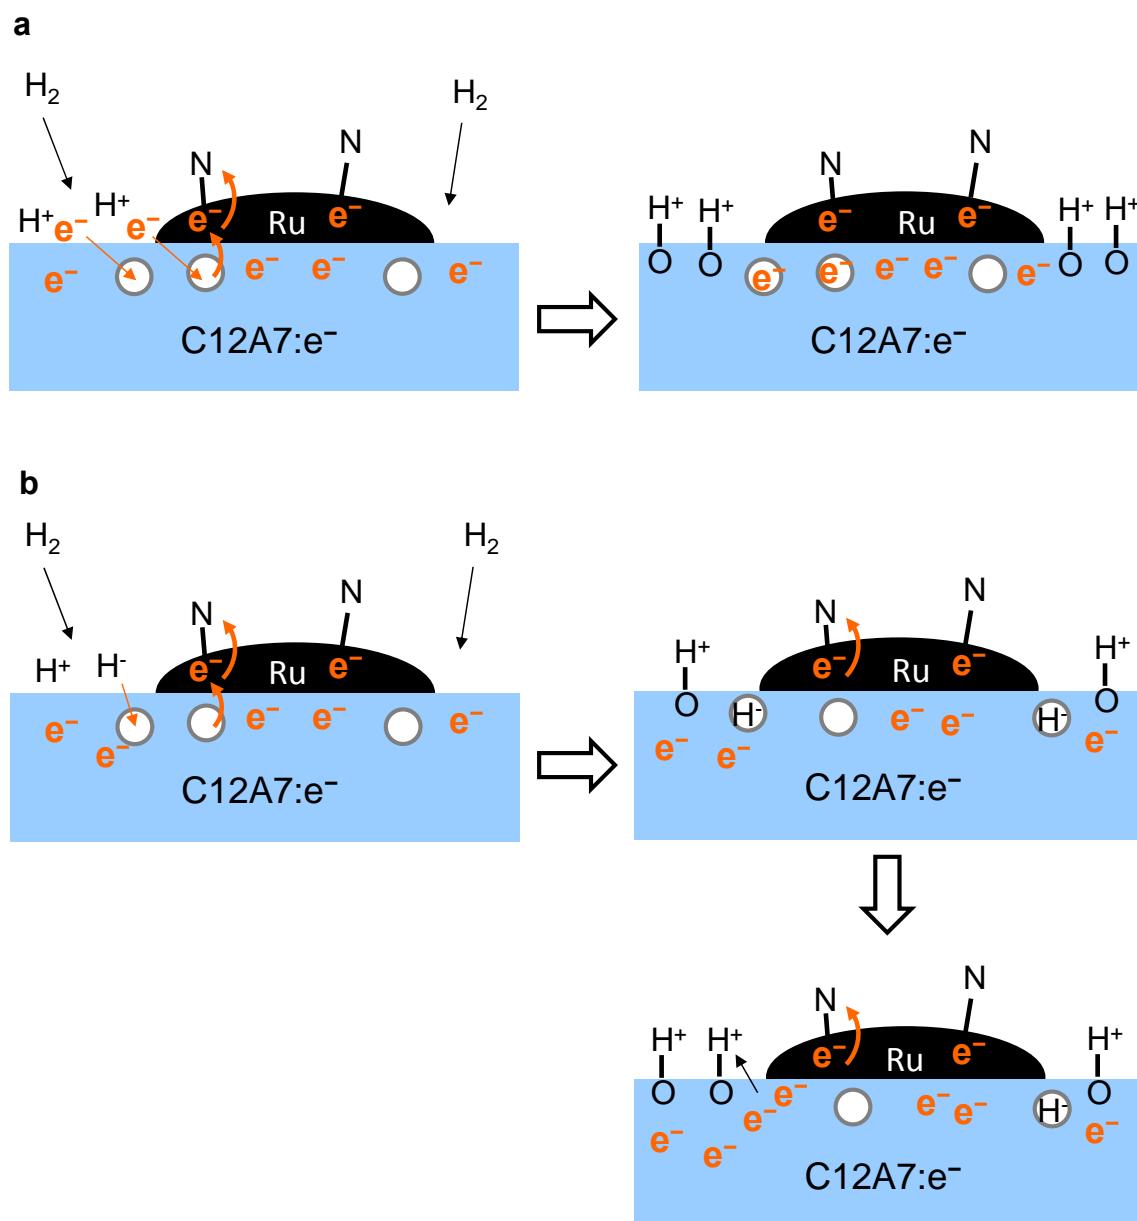

**Supplementary Figure 8** (a) Reaction pathway 1: H<sub>2</sub> is dissociated on Ru/C12A7:e<sup>-</sup> to produce two OH (formally H<sup>+</sup> state) species (homolytic dissociation). (b) Reaction pathway 2: H<sub>2</sub> is dissociated on Ru/C12A7:e<sup>-</sup> to produce OH (formally H<sup>+</sup> state) and H<sup>-</sup> ions (heterolytic dissociation).



**Supplementary Table 1** Catalytic performance of various Ru catalyst for ammonia synthesis reaction at 633 K

| Catalyst                 | Surface area<br>(m <sup>2</sup> g <sup>-1</sup> ) | Catalytic activity                                   |                                                      | Ea<br>(kJ mol <sup>-1</sup> ) <sup>f</sup> |
|--------------------------|---------------------------------------------------|------------------------------------------------------|------------------------------------------------------|--------------------------------------------|
|                          |                                                   | (mmol g <sup>-1</sup> h <sup>-1</sup> ) <sup>a</sup> | (mmol m <sup>-2</sup> h <sup>-1</sup> ) <sup>b</sup> |                                            |
| Ru/C12A7:e <sup>-</sup>  | 1.0                                               | 1.82                                                 | 1.82                                                 | 49                                         |
| Ru/C12A7:O <sup>2-</sup> | 1.0                                               | 0.25                                                 | 0.25                                                 | 104                                        |
| Ru-Cs/MgO                | 12                                                | 1.72                                                 | 0.14                                                 | 99                                         |
| Ru/CA                    | 1.2                                               | 0.15                                                 | 0.13                                                 | 118                                        |

<sup>a,b</sup>Reaction conditions: catalyst = 0.2 g, H<sub>2</sub>:N<sub>2</sub> = 3:1, flow rate = 60 mL min<sup>-1</sup>, pressure = 0.1 MPa. Catalytic activity was described as ammonia synthesis rate per (a) catalyst weight or per (b) surface area.
